# Supplementary material for: Husk to caryopsis adhesion in barley is influenced by pre- and post-anthesis temperatures through changes in a cuticular cementing layer on the caryopsis
Source: PubMed Central journal article supplement (PMC5651604; doi:10.1186/s12870-017-1113-4), 2017-10-23
Supplement: 12870_2017_1113_MOESM2_ESM.pdf [file 12870_2017_1113_MOESM2_ESM.pdf]

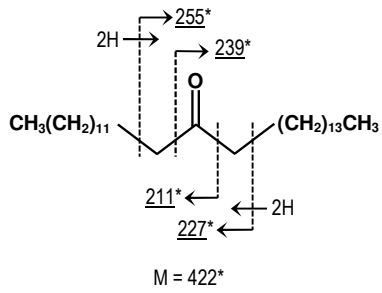

Nonacosan-14-one

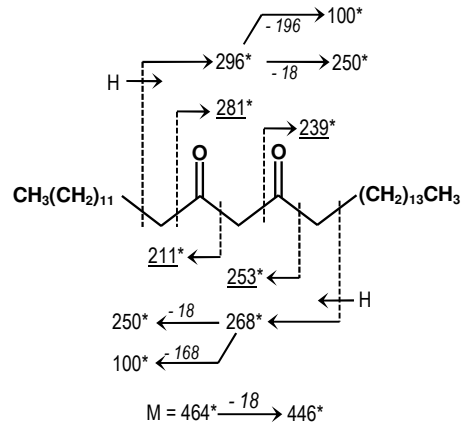

Hentriacontan-14,16-dione

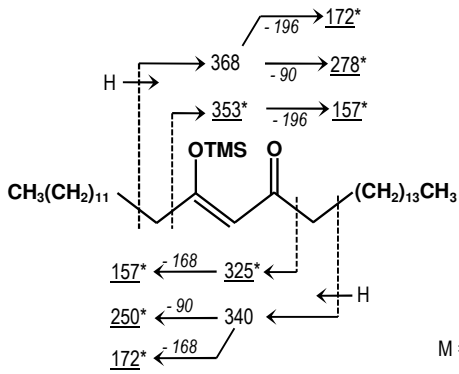

Hentriacontan-14-en-14-ol-16-one (TMS)

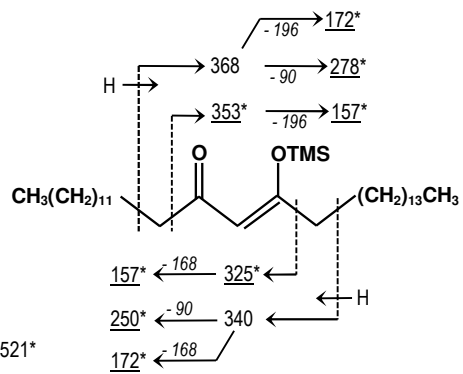

Hentriacontan-14-one-15-en-16-ol (TMS)

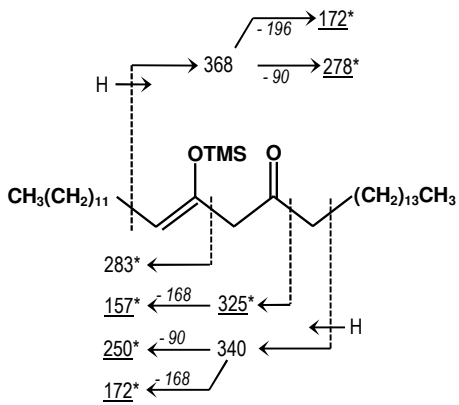

Hentriacontan-13-en-14-ol-16-one (TMS)

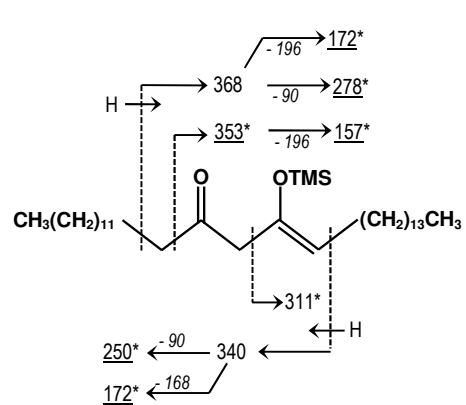

Hentriacontan-14-one-16-en-16-ol (TMS)

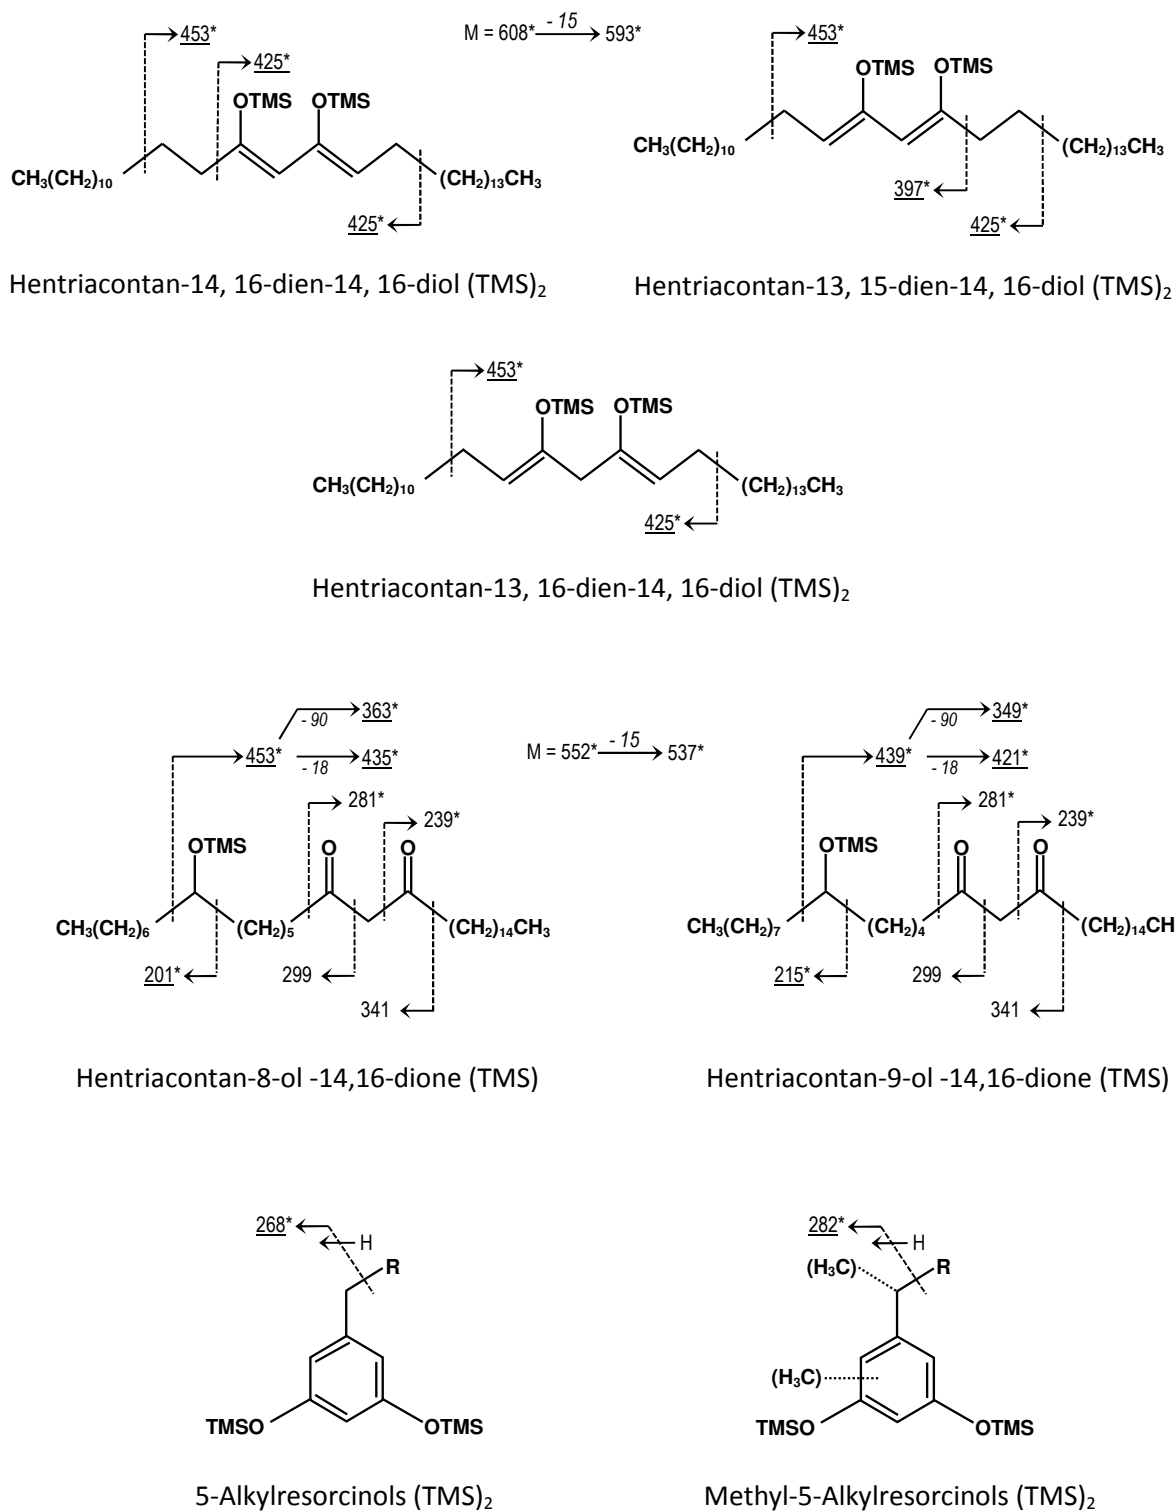

**Figure S1.** Mass spectrometric fragmentation patterns for ketones and TMS derivatives of  $\beta$ -diketones, enol and (enol)<sub>2</sub> tautomers of  $\beta$ -diketones, hydroxyl- $\beta$ -diketones and 5-alkyl resorcinols found in cuticular waxes of barley caryopses and husk.
