# Supplementary material for: Husk to caryopsis adhesion in barley is influenced by pre- and post-anthesis temperatures through changes in a cuticular cementing layer on the caryopsis
Source: PubMed Central journal article supplement (PMC5651604; doi:10.1186/s12870-017-1113-4), 2017-10-23
Supplement: 12870_2017_1113_MOESM5_ESM.pdf [file 12870_2017_1113_MOESM5_ESM.pdf]

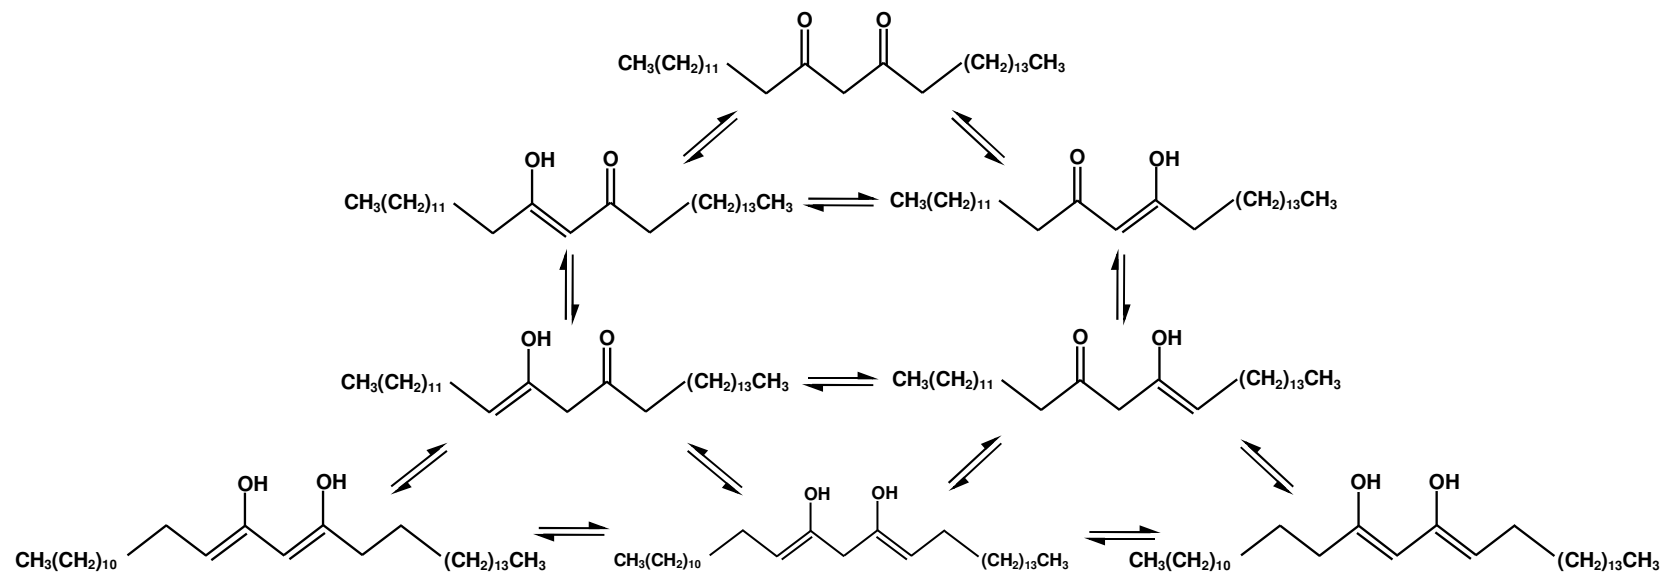

**Figure S3.** Interrelationship between Hentriacontan-14,16-dione and enol and (enol)<sub>2</sub> tautomers of Hentriacontan-14,16-dione
